# Supplementary material for: How can patient registries facilitate guideline-based healthcare? A retrospective analysis of the CEDATA-GPGE registry for pediatric inflammatory bowel disease
Source: PubMed Central journal article supplement (PMC10276369; doi:10.1186/s12913-023-09639-6), 2023-06-17
Supplement: 12913_2023_9639_MOESM1_ESM.pdf [file 12913_2023_9639_MOESM1_ESM.pdf]

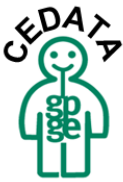

CHRONIC INFLAMMATORY BOWEL DISEASE (IBD) OF CHILDS AND ADOLESCENTS

INITIAL REPORTING FORM

\_\_\_\_ - \_\_\_\_  
Patient's identification number

|                           |                                                                                                                                                                                                                                                                                                                     |  |                                                                                                                                                                                                                                                                                                                            |  |                                                                                                                                                                                                                                                                                                                                                                                                                                                                                                                                                                                                                                                                                                           |  |                                                                                                                                                                                                                                                                                                                                                                                                                                                                                                                                                                                       |  |                                                                                                                                        |                                                     |                                                                                                                                                                                                                                                                                                                                                                                                                                                                                                                       |                                                          |                                                                                |  |                                                                                                                                                                                               |
|---------------------------|---------------------------------------------------------------------------------------------------------------------------------------------------------------------------------------------------------------------------------------------------------------------------------------------------------------------|--|----------------------------------------------------------------------------------------------------------------------------------------------------------------------------------------------------------------------------------------------------------------------------------------------------------------------------|--|-----------------------------------------------------------------------------------------------------------------------------------------------------------------------------------------------------------------------------------------------------------------------------------------------------------------------------------------------------------------------------------------------------------------------------------------------------------------------------------------------------------------------------------------------------------------------------------------------------------------------------------------------------------------------------------------------------------|--|---------------------------------------------------------------------------------------------------------------------------------------------------------------------------------------------------------------------------------------------------------------------------------------------------------------------------------------------------------------------------------------------------------------------------------------------------------------------------------------------------------------------------------------------------------------------------------------|--|----------------------------------------------------------------------------------------------------------------------------------------|-----------------------------------------------------|-----------------------------------------------------------------------------------------------------------------------------------------------------------------------------------------------------------------------------------------------------------------------------------------------------------------------------------------------------------------------------------------------------------------------------------------------------------------------------------------------------------------------|----------------------------------------------------------|--------------------------------------------------------------------------------|--|-----------------------------------------------------------------------------------------------------------------------------------------------------------------------------------------------|
| Patient                   | <input type="checkbox"/> Sex<br><input type="text"/> Date of birth (MM/YYYY)                                                                                                                                                                                                                                        |  | <input type="text"/> Date of investigation (DD/MM/YYYY)                                                                                                                                                                                                                                                                    |  |                                                                                                                                                                                                                                                                                                                                                                                                                                                                                                                                                                                                                                                                                                           |  | <input type="text"/> Country of birth                                                                                                                                                                                                                                                                                                                                                                                                                                                                                                                                                 |  | <input type="text"/> Postal code                                                                                                       |                                                     |                                                                                                                                                                                                                                                                                                                                                                                                                                                                                                                       |                                                          |                                                                                |  |                                                                                                                                                                                               |
|                           | <b>Type of Presentation</b><br><input type="radio"/> outpatient<br><input type="radio"/> day ward<br><input type="radio"/> inpatient                                                                                                                                                                                |  | <b>Reason visit</b><br><input type="radio"/> planned<br><input type="radio"/> acute                                                                                                                                                                                                                                        |  | <b>Diagnosis</b><br><input type="radio"/> Crohn's disease<br><input type="radio"/> Ulcerative colitis<br><input type="radio"/> unspecified CED                                                                                                                                                                                                                                                                                                                                                                                                                                                                                                                                                            |  | <b>other chronic diseases</b> <input type="radio"/> no <input type="radio"/> yes<br><input type="checkbox"/> allergy<br><input type="checkbox"/> proven immunodeficiency<br><input type="checkbox"/> other serious disease                                                                                                                                                                                                                                                                                                                                                            |  | <input type="text"/> height<br><input type="text"/> weight                                                                             |                                                     |                                                                                                                                                                                                                                                                                                                                                                                                                                                                                                                       |                                                          |                                                                                |  |                                                                                                                                                                                               |
| Basis data                | <b>Diagnosis by:</b><br><input type="radio"/> pediatric gastroenterologist<br><input type="radio"/> gastroenterologist<br><input type="radio"/> pediatric surgeon/surgeon                                                                                                                                           |  | <b>Diagnosis in:</b><br><input type="radio"/> own clinic/hospital<br><input type="radio"/> other hospital<br><input type="radio"/> other clinic                                                                                                                                                                            |  | <b>Symptoms until diagnosis</b> <input type="radio"/> no <input type="radio"/> yes<br><input type="checkbox"/> fever <input type="checkbox"/> reduced performance <input type="checkbox"/> lip-/mouthinvolvement <input type="checkbox"/> nausea/vomiting<br><input type="checkbox"/> anemia <input type="checkbox"/> other fistula <input type="checkbox"/> visible blood in stool <input type="checkbox"/> abdominal pain<br><input type="checkbox"/> diarrhea <input type="checkbox"/> loss of appetite <input type="checkbox"/> weightstagnancy/-loss <input type="checkbox"/> perianal lesion<br><input type="checkbox"/> disturbance of growth <input type="checkbox"/> other: <input type="text"/> |  |                                                                                                                                                                                                                                                                                                                                                                                                                                                                                                                                                                                       |  |                                                                                                                                        | <input type="text"/> date of diagnosis (DD/MM/YYYY) |                                                                                                                                                                                                                                                                                                                                                                                                                                                                                                                       | <input type="text"/> date of first symptoms (DD/MM/YYYY) |                                                                                |  |                                                                                                                                                                                               |
|                           | <input type="text"/> mother's height<br><input type="text"/> mother's country of birth<br><input type="text"/> mother's date of birth (MM/YYYY)                                                                                                                                                                     |  | <b>Vaccination suitable STIKO:</b><br><input type="radio"/> complete<br><input type="radio"/> not complete<br><input type="radio"/> not applicable                                                                                                                                                                         |  | <b>Number of siblings:</b><br>(half)sisters: <input type="text"/><br>(half)brothers: <input type="text"/>                                                                                                                                                                                                                                                                                                                                                                                                                                                                                                                                                                                                 |  | <b>IBD in family:</b> <input type="radio"/> no <input type="radio"/> yes<br>IBD mother: <input type="radio"/> CD <input type="radio"/> UC <input type="radio"/> IBD-U <input type="radio"/> no IBD<br>IBD father: <input type="radio"/> CD <input type="radio"/> UC <input type="radio"/> IBD-U <input type="radio"/> no IBD<br>IBD siblings: <input type="radio"/> CD <input type="radio"/> UC <input type="radio"/> IBD-U <input type="radio"/> no IBD<br>IBD relatives: <input type="radio"/> CD <input type="radio"/> UC <input type="radio"/> IBD-U <input type="radio"/> no IBD |  |                                                                                                                                        |                                                     |                                                                                                                                                                                                                                                                                                                                                                                                                                                                                                                       |                                                          |                                                                                |  |                                                                                                                                                                                               |
| Family history            | <input type="text"/> father's height<br><input type="text"/> father's country of birth                                                                                                                                                                                                                              |  |                                                                                                                                                                                                                                                                                                                            |  |                                                                                                                                                                                                                                                                                                                                                                                                                                                                                                                                                                                                                                                                                                           |  |                                                                                                                                                                                                                                                                                                                                                                                                                                                                                                                                                                                       |  |                                                                                                                                        |                                                     |                                                                                                                                                                                                                                                                                                                                                                                                                                                                                                                       |                                                          |                                                                                |  |                                                                                                                                                                                               |
|                           | <b>Condition</b><br><input type="radio"/> very good<br><input type="radio"/> good<br><input type="radio"/> medium<br><input type="radio"/> bad<br><input type="radio"/> very bad                                                                                                                                    |  | <b>Appetite</b><br><input type="radio"/> good<br><input type="radio"/> moderate<br><input type="radio"/> bad                                                                                                                                                                                                               |  | <b>Restrictions daily life</b><br><input type="radio"/> no<br><input type="radio"/> mild<br><input type="radio"/> obvious                                                                                                                                                                                                                                                                                                                                                                                                                                                                                                                                                                                 |  | <b>Fever</b><br><input type="radio"/> no<br><input type="radio"/> yes                                                                                                                                                                                                                                                                                                                                                                                                                                                                                                                 |  | <b>Defecation</b><br><b>Consistence</b><br><input type="radio"/> shaped<br><input type="radio"/> mushy<br><input type="radio"/> liquid |                                                     | <b>Blood in stool</b><br><input type="radio"/> no<br><input type="radio"/> occasionally, little<br><input type="radio"/> mostly, little<br><input type="radio"/> much                                                                                                                                                                                                                                                                                                                                                 |                                                          | <b>Count</b><br>by day: <input type="text"/><br>by night: <input type="text"/> |  | <b>Abdominal pain</b><br><input type="radio"/> none<br><input type="radio"/> lightly<br><input type="radio"/> moderately<br><input type="radio"/> severe<br><input type="checkbox"/> by night |
| Anamnesis until diagnosis | <b>Abdonimal finding</b><br><input type="radio"/> inconspicuous<br><input type="radio"/> conspicuous<br><input type="checkbox"/> pressure pain<br><input type="checkbox"/> resistance<br><input type="checkbox"/> defense                                                                                           |  | <b>Anal finding</b><br><input type="checkbox"/> inconspicuous/irritation-free skin-tags<br><input type="checkbox"/> rhagade/fissure<br><input type="checkbox"/> inactive fistula<br><input type="checkbox"/> secreting fistula/abcess inflam-matory induration<br><input type="checkbox"/> multiple/inflammatory skin-tags |  | <b>Perianal eczema</b><br><input type="radio"/> no<br><input type="radio"/> yes                                                                                                                                                                                                                                                                                                                                                                                                                                                                                                                                                                                                                           |  | <b>Oral apthae ulcers</b><br><input type="radio"/> no<br><input type="radio"/> yes                                                                                                                                                                                                                                                                                                                                                                                                                                                                                                    |  | <b>cheilitis</b><br><input type="radio"/> no<br><input type="radio"/> yes                                                              |                                                     | <b>extraintestinal Symptoms</b> <input type="radio"/> no <input type="radio"/> yes<br><input type="checkbox"/> eye <input type="checkbox"/> skin<br><input type="checkbox"/> liver/biliary tract/pancreas <input type="checkbox"/> PSC/overlap<br><input type="checkbox"/> acute pancreatitis <input type="checkbox"/> nephritis<br><input type="checkbox"/> joint: inflammation peripheral <input type="checkbox"/> spinal column<br><input type="checkbox"/> joint: pain peripheral <input type="checkbox"/> others |                                                          |                                                                                |  |                                                                                                                                                                                               |
|                           | <b>Tanner's stages</b><br>PH(1-5) <input type="text"/> B(1-5) <input type="text"/> testicular volume (ml) <input type="text"/> menarche: <input type="radio"/> no <input type="radio"/> yes <input type="text"/> (year)                                                                                             |  |                                                                                                                                                                                                                                                                                                                            |  |                                                                                                                                                                                                                                                                                                                                                                                                                                                                                                                                                                                                                                                                                                           |  |                                                                                                                                                                                                                                                                                                                                                                                                                                                                                                                                                                                       |  |                                                                                                                                        |                                                     |                                                                                                                                                                                                                                                                                                                                                                                                                                                                                                                       |                                                          |                                                                                |  |                                                                                                                                                                                               |
| Examination               | hemoglobin <input type="text"/> <small>Ommol/l</small><br>hematocrit <input type="text"/> <small>Og/dl</small><br>MCV <input type="text"/> <small>O%<br/>O/l</small><br>thrombocytes <input type="text"/> <small>Oμm<sup>3</sup><br/>Ofi</small><br>leucocytes <input type="text"/> <small>O1/μl<br/>OGpt/l</small> |  | CRP <input type="text"/> <small>Omg/dl<br/>Omg/l</small><br>ESR <input type="text"/> <small>mm/h</small><br>ALAT (GPT) <input type="text"/> <small>OU/l<br/>Oμmol/(l*s)</small><br>Gamma-GT <input type="text"/> <small>OU/l<br/>Oμmol/(l*s)</small><br>lipase <input type="text"/> <small>OU/l<br/>Oμmol/(l*s)</small>    |  | albumin <input type="text"/> <small>Og/dl<br/>Og/l</small><br>creatinine <input type="text"/> <small>Omg/dl<br/>Oμmol/l</small><br>calprotectin <input type="text"/> <small>Omg/l<br/>Omg/kg</small>                                                                                                                                                                                                                                                                                                                                                                                                                                                                                                      |  | <b>rare laboratory:</b><br><input type="radio"/> no<br><input type="radio"/> yes<br><b>(see addi-tional sheet)</b>                                                                                                                                                                                                                                                                                                                                                                                                                                                                    |  |                                                                                                                                        |                                                     |                                                                                                                                                                                                                                                                                                                                                                                                                                                                                                                       |                                                          |                                                                                |  |                                                                                                                                                                                               |
|                           |                                                                                                                                                                                                                                                                                                                     |  |                                                                                                                                                                                                                                                                                                                            |  |                                                                                                                                                                                                                                                                                                                                                                                                                                                                                                                                                                                                                                                                                                           |  |                                                                                                                                                                                                                                                                                                                                                                                                                                                                                                                                                                                       |  |                                                                                                                                        |                                                     |                                                                                                                                                                                                                                                                                                                                                                                                                                                                                                                       |                                                          |                                                                                |  |                                                                                                                                                                                               |

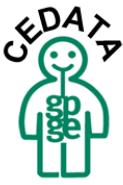

# CHRONIC INFLAMMATORY BOWEL DISEASE (IBD) OF CHILDS AND ADOLESCENTS

## INITIAL REPORTING FORM

|  |  |  |  |  |  |  |  |  |  |
|--|--|--|--|--|--|--|--|--|--|
|  |  |  |  |  |  |  |  |  |  |
|--|--|--|--|--|--|--|--|--|--|

Patient's identification number

|                               |                                                                                                                                                                                                                                                                                                                                                                                                                                                                                                                                                                                                                                                                                                                                                                                                                                                                                                                                                                                                                                                                                                                                                                                                                                                                                                                                                                                                                                                                                                                          |                                                                                                                                                                                                                                                                                                                                                                                                                                                                                                                                                                                                                                                                                                                                                                                                                                                                                                                                                                                                                                                                                                                                                                                                                                                                                                                                                                                                                                                                                                                                             |                                                                                                                                                                                                                                                                                                                                                                                                                                                                                                                                                                                                                                                                                                                                                                                                                                                                                                                                                                                                                                                                                                                                                                                                                                                                                                                                                                                                                                                                                                                                             |                                                                                                                                                                                                                                                                                                                                              |
|-------------------------------|--------------------------------------------------------------------------------------------------------------------------------------------------------------------------------------------------------------------------------------------------------------------------------------------------------------------------------------------------------------------------------------------------------------------------------------------------------------------------------------------------------------------------------------------------------------------------------------------------------------------------------------------------------------------------------------------------------------------------------------------------------------------------------------------------------------------------------------------------------------------------------------------------------------------------------------------------------------------------------------------------------------------------------------------------------------------------------------------------------------------------------------------------------------------------------------------------------------------------------------------------------------------------------------------------------------------------------------------------------------------------------------------------------------------------------------------------------------------------------------------------------------------------|---------------------------------------------------------------------------------------------------------------------------------------------------------------------------------------------------------------------------------------------------------------------------------------------------------------------------------------------------------------------------------------------------------------------------------------------------------------------------------------------------------------------------------------------------------------------------------------------------------------------------------------------------------------------------------------------------------------------------------------------------------------------------------------------------------------------------------------------------------------------------------------------------------------------------------------------------------------------------------------------------------------------------------------------------------------------------------------------------------------------------------------------------------------------------------------------------------------------------------------------------------------------------------------------------------------------------------------------------------------------------------------------------------------------------------------------------------------------------------------------------------------------------------------------|---------------------------------------------------------------------------------------------------------------------------------------------------------------------------------------------------------------------------------------------------------------------------------------------------------------------------------------------------------------------------------------------------------------------------------------------------------------------------------------------------------------------------------------------------------------------------------------------------------------------------------------------------------------------------------------------------------------------------------------------------------------------------------------------------------------------------------------------------------------------------------------------------------------------------------------------------------------------------------------------------------------------------------------------------------------------------------------------------------------------------------------------------------------------------------------------------------------------------------------------------------------------------------------------------------------------------------------------------------------------------------------------------------------------------------------------------------------------------------------------------------------------------------------------|----------------------------------------------------------------------------------------------------------------------------------------------------------------------------------------------------------------------------------------------------------------------------------------------------------------------------------------------|
| <b>apparative diagnostics</b> | <b>apparative diagnostics</b> <input type="radio"/> not performed <input type="radio"/> performed                                                                                                                                                                                                                                                                                                                                                                                                                                                                                                                                                                                                                                                                                                                                                                                                                                                                                                                                                                                                                                                                                                                                                                                                                                                                                                                                                                                                                        |                                                                                                                                                                                                                                                                                                                                                                                                                                                                                                                                                                                                                                                                                                                                                                                                                                                                                                                                                                                                                                                                                                                                                                                                                                                                                                                                                                                                                                                                                                                                             |                                                                                                                                                                                                                                                                                                                                                                                                                                                                                                                                                                                                                                                                                                                                                                                                                                                                                                                                                                                                                                                                                                                                                                                                                                                                                                                                                                                                                                                                                                                                             |                                                                                                                                                                                                                                                                                                                                              |
| <b>localization</b>           | <input type="checkbox"/> esophagogastroduodenoscopy <input type="checkbox"/> MRT-enterography <input type="checkbox"/> ileocoloscopy <input type="checkbox"/> colonoscopy <input type="checkbox"/> rectosigmoidoscopy<br><input type="checkbox"/> histology lower gastrointestinal tract <input type="checkbox"/> X-ray small intestine <input type="checkbox"/> ultrasound <input type="checkbox"/> bone densitometry <input type="checkbox"/> others: <input style="width: 100px;" type="text"/><br><input type="checkbox"/> histology upper gastrointestinal tract <input type="checkbox"/> CT abdomen <input type="checkbox"/> video capsule endoscopy <input type="checkbox"/> liver biopsy                                                                                                                                                                                                                                                                                                                                                                                                                                                                                                                                                                                                                                                                                                                                                                                                                         |                                                                                                                                                                                                                                                                                                                                                                                                                                                                                                                                                                                                                                                                                                                                                                                                                                                                                                                                                                                                                                                                                                                                                                                                                                                                                                                                                                                                                                                                                                                                             |                                                                                                                                                                                                                                                                                                                                                                                                                                                                                                                                                                                                                                                                                                                                                                                                                                                                                                                                                                                                                                                                                                                                                                                                                                                                                                                                                                                                                                                                                                                                             |                                                                                                                                                                                                                                                                                                                                              |
| <b>Comp.</b>                  | <b>complications</b> <input type="radio"/> no <input type="radio"/> yes <input type="radio"/> unknown                                                                                                                                                                                                                                                                                                                                                                                                                                                                                                                                                                                                                                                                                                                                                                                                                                                                                                                                                                                                                                                                                                                                                                                                                                                                                                                                                                                                                    |                                                                                                                                                                                                                                                                                                                                                                                                                                                                                                                                                                                                                                                                                                                                                                                                                                                                                                                                                                                                                                                                                                                                                                                                                                                                                                                                                                                                                                                                                                                                             |                                                                                                                                                                                                                                                                                                                                                                                                                                                                                                                                                                                                                                                                                                                                                                                                                                                                                                                                                                                                                                                                                                                                                                                                                                                                                                                                                                                                                                                                                                                                             |                                                                                                                                                                                                                                                                                                                                              |
| <b>Surgery</b>                | <input type="checkbox"/> perianal abscess <input type="checkbox"/> stenosis <input type="checkbox"/> perianal fistula <input type="checkbox"/> other type of fistula <input type="checkbox"/> other type of abscess<br><br><b>Surgery</b> <input type="radio"/> no <input type="radio"/> yes <input type="radio"/> planned surgery    date of surgery: <input style="width: 100px;" type="text"/>                                                                                                                                                                                                                                                                                                                                                                                                                                                                                                                                                                                                                                                                                                                                                                                                                                                                                                                                                                                                                                                                                                                        |                                                                                                                                                                                                                                                                                                                                                                                                                                                                                                                                                                                                                                                                                                                                                                                                                                                                                                                                                                                                                                                                                                                                                                                                                                                                                                                                                                                                                                                                                                                                             |                                                                                                                                                                                                                                                                                                                                                                                                                                                                                                                                                                                                                                                                                                                                                                                                                                                                                                                                                                                                                                                                                                                                                                                                                                                                                                                                                                                                                                                                                                                                             |                                                                                                                                                                                                                                                                                                                                              |
| <b>Induction therapy</b>      | <b>Induction therapy</b> <input type="radio"/> no <input type="radio"/> yes                                                                                                                                                                                                                                                                                                                                                                                                                                                                                                                                                                                                                                                                                                                                                                                                                                                                                                                                                                                                                                                                                                                                                                                                                                                                                                                                                                                                                                              |                                                                                                                                                                                                                                                                                                                                                                                                                                                                                                                                                                                                                                                                                                                                                                                                                                                                                                                                                                                                                                                                                                                                                                                                                                                                                                                                                                                                                                                                                                                                             |                                                                                                                                                                                                                                                                                                                                                                                                                                                                                                                                                                                                                                                                                                                                                                                                                                                                                                                                                                                                                                                                                                                                                                                                                                                                                                                                                                                                                                                                                                                                             |                                                                                                                                                                                                                                                                                                                                              |
| <b>side effects</b>           | <b>Side effects</b> <input type="radio"/> no <input type="radio"/> yes                                                                                                                                                                                                                                                                                                                                                                                                                                                                                                                                                                                                                                                                                                                                                                                                                                                                                                                                                                                                                                                                                                                                                                                                                                                                                                                                                                                                                                                   |                                                                                                                                                                                                                                                                                                                                                                                                                                                                                                                                                                                                                                                                                                                                                                                                                                                                                                                                                                                                                                                                                                                                                                                                                                                                                                                                                                                                                                                                                                                                             |                                                                                                                                                                                                                                                                                                                                                                                                                                                                                                                                                                                                                                                                                                                                                                                                                                                                                                                                                                                                                                                                                                                                                                                                                                                                                                                                                                                                                                                                                                                                             |                                                                                                                                                                                                                                                                                                                                              |
| <b>conclusion</b>             | <b>Medical overall assessment</b>                                                                                                                                                                                                                                                                                                                                                                                                                                                                                                                                                                                                                                                                                                                                                                                                                                                                                                                                                                                                                                                                                                                                                                                                                                                                                                                                                                                                                                                                                        |                                                                                                                                                                                                                                                                                                                                                                                                                                                                                                                                                                                                                                                                                                                                                                                                                                                                                                                                                                                                                                                                                                                                                                                                                                                                                                                                                                                                                                                                                                                                             |                                                                                                                                                                                                                                                                                                                                                                                                                                                                                                                                                                                                                                                                                                                                                                                                                                                                                                                                                                                                                                                                                                                                                                                                                                                                                                                                                                                                                                                                                                                                             |                                                                                                                                                                                                                                                                                                                                              |
| <b>apparative diagnostics</b> | <input type="radio"/> inconspicuous <input type="checkbox"/> mouth <input type="checkbox"/> esophagus <input type="checkbox"/> stomach <input type="checkbox"/> duodenum <input type="checkbox"/> remaining small intestine <input type="checkbox"/> term. ileum<br><input type="checkbox"/> caecum <input type="checkbox"/> colon asc. <input type="checkbox"/> colon trans. <input type="checkbox"/> colon desc. <input type="checkbox"/> sigmoid colon <input type="checkbox"/> rectum <input type="checkbox"/> anus<br>overall assessment: <input style="width: 100%; height: 20px;" type="text"/>                                                                                                                                                                                                                                                                                                                                                                                                                                                                                                                                                                                                                                                                                                                                                                                                                                                                                                                   |                                                                                                                                                                                                                                                                                                                                                                                                                                                                                                                                                                                                                                                                                                                                                                                                                                                                                                                                                                                                                                                                                                                                                                                                                                                                                                                                                                                                                                                                                                                                             |                                                                                                                                                                                                                                                                                                                                                                                                                                                                                                                                                                                                                                                                                                                                                                                                                                                                                                                                                                                                                                                                                                                                                                                                                                                                                                                                                                                                                                                                                                                                             |                                                                                                                                                                                                                                                                                                                                              |
| <b>Surgery</b>                | <b>Indication</b><br><input type="checkbox"/> conglomerate tumor<br><input type="checkbox"/> abscess (except perianal)<br><input type="checkbox"/> stenosis ° <input type="checkbox"/> megacolon<br><input type="checkbox"/> perforation <input type="checkbox"/> fistula (expect perianal) *<br><input type="checkbox"/> suture dehiscence<br><input type="checkbox"/> bleeding<br><input type="checkbox"/> perianal complications (fistula, abscess)<br><input type="checkbox"/> others: <input style="width: 100px;" type="text"/>                                                                                                                                                                                                                                                                                                                                                                                                                                                                                                                                                                                                                                                                                                                                                                                                                                                                                                                                                                                    | <b>Type of surgery</b><br><input type="checkbox"/> ileocecal resection <input type="checkbox"/> colectomy<br><input type="checkbox"/> hemicolectomy right <input type="checkbox"/> hemicolectomy left<br><input type="checkbox"/> partial colon resection <input type="checkbox"/> rectal resection<br><input type="checkbox"/> gastrojejunostomy <input type="checkbox"/> partial small intestine resection<br><input type="checkbox"/> fistula drainage <input type="checkbox"/> exploration<br><input type="checkbox"/> stricturoplasty <input type="checkbox"/> fistula/abscess cleavage<br><input type="checkbox"/> balloon dilatation <input type="checkbox"/> PEG-insertion with jejunal extension<br><input type="checkbox"/> PEG-insertion <input type="checkbox"/> polypectomy<br><input type="checkbox"/> stoma insertion<br><input type="checkbox"/> others: <input style="width: 100px;" type="text"/>                                                                                                                                                                                                                                                                                                                                                                                                                                                                                                                                                                                                                         | <b>Type of fistula *</b><br><b>(referring to surgery fistula)</b><br><input type="checkbox"/> rectovaginal<br><input type="checkbox"/> enterovesical<br><input type="checkbox"/> enterocutaneous<br><input type="checkbox"/> enteroenteral<br><input type="checkbox"/> enterocolic<br><input type="checkbox"/> ending blindly                                                                                                                                                                                                                                                                                                                                                                                                                                                                                                                                                                                                                                                                                                                                                                                                                                                                                                                                                                                                                                                                                                                                                                                                               | <b>Localization °</b><br><b>(referring to surgery stenosis)</b><br><input type="checkbox"/> esophagus<br><input type="checkbox"/> stomach<br><input type="checkbox"/> duodenum<br><input type="checkbox"/> prox. ileum, Jejunum<br><input type="checkbox"/> term. ileum<br><input type="checkbox"/> colon<br><input type="checkbox"/> rectum |
| <b>Induction therapy</b>      | <b>1<sup>st</sup> month</b><br><input type="checkbox"/> antibiotics * <input type="checkbox"/> corticoids [not budesonide]<br><input type="checkbox"/> tacrolimus <input type="checkbox"/> 6-mercaptopurine<br><input type="checkbox"/> budesonide <input type="checkbox"/> methotrexate<br><input type="checkbox"/> vitamin D <input type="checkbox"/> adalimumab<br><input type="checkbox"/> azathioprine <input type="checkbox"/> other biologicals name: <input style="width: 100px;" type="text"/><br><input type="checkbox"/> iron <input type="radio"/> Cyclosporin A<br>p.o O.i.v. On.s.    Op.o O.i.v. On.s.<br><input type="checkbox"/> calcium <input type="checkbox"/> steroid pulse therapy<br><input type="checkbox"/> nutritional therapy <input type="checkbox"/> complementary medicine<br><input type="checkbox"/> Oexclusively Opartially <input type="checkbox"/> incense <input type="checkbox"/> fish-oil <input type="checkbox"/> lecithin<br><input type="checkbox"/> Osupplementary <input type="checkbox"/> probiotics<br><input type="checkbox"/> sulfasalazine <input type="checkbox"/> vedolizumab <sup>1</sup><br><input type="checkbox"/> mesalazine <input type="checkbox"/> ustekinumab <sup>1</sup><br><input type="checkbox"/> golimumab <sup>1</sup> <input type="checkbox"/> special diet<br><input type="checkbox"/> tofacitinib <sup>1</sup><br><input type="checkbox"/> rectal therapy    O5-ASA mesalazine<br><input type="radio"/> corticoids <input type="radio"/> budesonide | <b>2<sup>nd</sup> month</b> weight:    height:<br><input type="checkbox"/> antibiotics * <input type="checkbox"/> corticoids [not budesonide]<br><input type="checkbox"/> tacrolimus <input type="checkbox"/> 6-mercaptopurine<br><input type="checkbox"/> budesonide <input type="checkbox"/> methotrexate<br><input type="checkbox"/> vitamin D <input type="checkbox"/> adalimumab<br><input type="checkbox"/> azathioprine <input type="checkbox"/> other biologicals name: <input style="width: 100px;" type="text"/><br><input type="checkbox"/> iron <input type="radio"/> Cyclosporin A<br>p.o O.i.v. On.s.    Op.o O.i.v. On.s.<br><input type="checkbox"/> calcium <input type="checkbox"/> steroid pulse therapy<br><input type="checkbox"/> nutritional therapy <input type="checkbox"/> complementary medicine<br><input type="checkbox"/> Oexclusively Opartially <input type="checkbox"/> incense <input type="checkbox"/> fish-oil <input type="checkbox"/> lecithin<br><input type="checkbox"/> Osupplementary <input type="checkbox"/> probiotics<br><input type="checkbox"/> sulfasalazine <input type="checkbox"/> vedolizumab <sup>1</sup><br><input type="checkbox"/> mesalazine <input type="checkbox"/> ustekinumab <sup>1</sup><br><input type="checkbox"/> golimumab <sup>1</sup> <input type="checkbox"/> special diet<br><input type="checkbox"/> tofacitinib <sup>1</sup><br><input type="checkbox"/> rectal therapy    O5-ASA mesalazine<br><input type="radio"/> corticoids <input type="radio"/> budesonide | <b>3<sup>rd</sup> month</b> weight:    height:<br><input type="checkbox"/> antibiotics * <input type="checkbox"/> corticoids [not budesonide]<br><input type="checkbox"/> tacrolimus <input type="checkbox"/> 6-mercaptopurine<br><input type="checkbox"/> budesonide <input type="checkbox"/> methotrexate<br><input type="checkbox"/> vitamin D <input type="checkbox"/> adalimumab<br><input type="checkbox"/> azathioprine <input type="checkbox"/> other biologicals name: <input style="width: 100px;" type="text"/><br><input type="checkbox"/> iron <input type="radio"/> Cyclosporin A<br>p.o O.i.v. On.s.    Op.o O.i.v. On.s.<br><input type="checkbox"/> calcium <input type="checkbox"/> steroid pulse therapy<br><input type="checkbox"/> nutritional therapy <input type="checkbox"/> complementary medicine<br><input type="checkbox"/> Oexclusively Opartially <input type="checkbox"/> incense <input type="checkbox"/> fish-oil <input type="checkbox"/> lecithin<br><input type="checkbox"/> Osupplementary <input type="checkbox"/> probiotics<br><input type="checkbox"/> sulfasalazine <input type="checkbox"/> vedolizumab <sup>1</sup><br><input type="checkbox"/> mesalazine <input type="checkbox"/> ustekinumab <sup>1</sup><br><input type="checkbox"/> golimumab <sup>1</sup> <input type="checkbox"/> special diet<br><input type="checkbox"/> tofacitinib <sup>1</sup><br><input type="checkbox"/> rectal therapy    O5-ASA mesalazine<br><input type="radio"/> corticoids <input type="radio"/> budesonide | * see additional sheet 1 cover-off-label use                                                                                                                                                                                                                                                                                                 |
| <b>side effects</b>           | <input type="checkbox"/> acne <input type="checkbox"/> depressiveness <input type="checkbox"/> alopecia <input type="checkbox"/> increased levels of lipases <input type="checkbox"/> increased levels of transaminases<br><input type="checkbox"/> abdominal pain <input type="checkbox"/> diarrhea <input type="checkbox"/> hypertrichosis <input type="checkbox"/> acute allergic reaction <input type="checkbox"/> hypertension<br><input type="checkbox"/> vomiting/nausea <input type="checkbox"/> headaches <input type="checkbox"/> pancreatitis <input type="checkbox"/> personality changes <input type="checkbox"/> Cushing's disease<br><input type="checkbox"/> glaucoma <input type="checkbox"/> leukopenia <input type="checkbox"/> thrombocytopenia <input type="checkbox"/> skin changes <input type="checkbox"/> nephritis/increased levels of creatinine                                                                                                                                                                                                                                                                                                                                                                                                                                                                                                                                                                                                                                              |                                                                                                                                                                                                                                                                                                                                                                                                                                                                                                                                                                                                                                                                                                                                                                                                                                                                                                                                                                                                                                                                                                                                                                                                                                                                                                                                                                                                                                                                                                                                             |                                                                                                                                                                                                                                                                                                                                                                                                                                                                                                                                                                                                                                                                                                                                                                                                                                                                                                                                                                                                                                                                                                                                                                                                                                                                                                                                                                                                                                                                                                                                             |                                                                                                                                                                                                                                                                                                                                              |
| <b>conclusion</b>             | <b>Medical overall assessment</b>                                                                                                                                                                                                                                                                                                                                                                                                                                                                                                                                                                                                                                                                                                                                                                                                                                                                                                                                                                                                                                                                                                                                                                                                                                                                                                                                                                                                                                                                                        |                                                                                                                                                                                                                                                                                                                                                                                                                                                                                                                                                                                                                                                                                                                                                                                                                                                                                                                                                                                                                                                                                                                                                                                                                                                                                                                                                                                                                                                                                                                                             |                                                                                                                                                                                                                                                                                                                                                                                                                                                                                                                                                                                                                                                                                                                                                                                                                                                                                                                                                                                                                                                                                                                                                                                                                                                                                                                                                                                                                                                                                                                                             |                                                                                                                                                                                                                                                                                                                                              |
| <b>conclusion</b>             | <input type="radio"/> remission <input type="radio"/> mild activity <input type="radio"/> moderate activity <input type="radio"/> severe activity                                                                                                                                                                                                                                                                                                                                                                                                                                                                                                                                                                                                                                                                                                                                                                                                                                                                                                                                                                                                                                                                                                                                                                                                                                                                                                                                                                        |                                                                                                                                                                                                                                                                                                                                                                                                                                                                                                                                                                                                                                                                                                                                                                                                                                                                                                                                                                                                                                                                                                                                                                                                                                                                                                                                                                                                                                                                                                                                             |                                                                                                                                                                                                                                                                                                                                                                                                                                                                                                                                                                                                                                                                                                                                                                                                                                                                                                                                                                                                                                                                                                                                                                                                                                                                                                                                                                                                                                                                                                                                             |                                                                                                                                                                                                                                                                                                                                              |

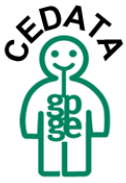

CHRONIC INFLAMMATORY BOWEL DISEASE (IBD) OF CHILDS AND ADOLESCENTS

DOCUMENTATIONFORM

\_\_\_\_ - \_\_\_\_  
Patient's identification number

|                                |                                                                                                                                         |                                                                               |                                                                                                                                                |                                                                                                                                                                                                                                                                                                                           |                                                              |                                            |                                                         |                                                                                                            |                                      |
|--------------------------------|-----------------------------------------------------------------------------------------------------------------------------------------|-------------------------------------------------------------------------------|------------------------------------------------------------------------------------------------------------------------------------------------|---------------------------------------------------------------------------------------------------------------------------------------------------------------------------------------------------------------------------------------------------------------------------------------------------------------------------|--------------------------------------------------------------|--------------------------------------------|---------------------------------------------------------|------------------------------------------------------------------------------------------------------------|--------------------------------------|
| Basic data                     | <input type="text"/> / <input type="text"/> / <input type="text"/> - <input type="text"/> / <input type="text"/> / <input type="text"/> |                                                                               | <input type="text"/> / <input type="text"/> / <input type="text"/> - <input type="text"/> / <input type="text"/> / <input type="text"/>        |                                                                                                                                                                                                                                                                                                                           | <input type="text"/>                                         |                                            |                                                         |                                                                                                            |                                      |
|                                | Date of presentation (DD/MM/YYYY)                                                                                                       |                                                                               | Date of last presentation(DD/MM/YYYY)                                                                                                          |                                                                                                                                                                                                                                                                                                                           | Number of undocumented presentations                         |                                            |                                                         |                                                                                                            |                                      |
|                                | <b>Type of presentation</b><br><input type="radio"/> outpatient<br><input type="radio"/> day ward<br><input type="radio"/> inpatient    | <b>Reason</b><br><input type="radio"/> planned<br><input type="radio"/> acute | <b>Diagnosis</b><br><input type="radio"/> Crohn's disease<br><input type="radio"/> Ulcerative colitis<br><input type="radio"/> unspecified IBD | <b>Other chronic diseases</b> <input type="radio"/> no <input type="radio"/> yes<br><input type="checkbox"/> allergy <input type="checkbox"/> autoimmune disease<br><input type="checkbox"/> proven immunodeficiency <input type="checkbox"/> further malignant disease<br><input type="checkbox"/> other serious disease |                                                              |                                            |                                                         | height                                                                                                     |                                      |
|                                |                                                                                                                                         |                                                                               |                                                                                                                                                |                                                                                                                                                                                                                                                                                                                           |                                                              | weight                                     |                                                         |                                                                                                            |                                      |
| Anamnesis                      | <b>Condition</b>                                                                                                                        | <b>Appetite</b>                                                               | <b>Restrictions daily life</b>                                                                                                                 | <b>Fever</b>                                                                                                                                                                                                                                                                                                              | <b>Defecation</b>                                            |                                            |                                                         | <b>Abdominal pain</b>                                                                                      | <b>vaccination since last inves-</b> |
|                                | <input type="radio"/> very good                                                                                                         | <input type="radio"/> good                                                    | <input type="radio"/> no                                                                                                                       | <input type="radio"/> no                                                                                                                                                                                                                                                                                                  | <b>consistence</b>                                           | <b>blood in stool</b>                      | <b>Count</b>                                            | <input type="radio"/> none                                                                                 | <input type="radio"/> yes            |
|                                | <input type="radio"/> good                                                                                                              | <input type="radio"/> moderate                                                | <input type="radio"/> mild                                                                                                                     | <input type="radio"/> yes                                                                                                                                                                                                                                                                                                 | <input type="radio"/> shaped                                 | <input type="radio"/> no                   | by day <input type="text"/>                             | <input type="radio"/> lightly                                                                              | <input type="radio"/> no             |
|                                | <input type="radio"/> medium                                                                                                            | <input type="radio"/> bad                                                     | <input type="radio"/> obvious                                                                                                                  |                                                                                                                                                                                                                                                                                                                           | <input type="radio"/> mushy                                  | <input type="radio"/> occationally, little | by night <input type="text"/>                           | <input type="radio"/> moderately                                                                           | Which?                               |
|                                | <input type="radio"/> bad                                                                                                               |                                                                               | <b>school absence days</b>                                                                                                                     |                                                                                                                                                                                                                                                                                                                           | <input type="radio"/> liquid                                 | <input type="radio"/> mostly, little       |                                                         | <input type="radio"/> severe                                                                               |                                      |
| <input type="radio"/> very bad |                                                                                                                                         |                                                                               |                                                                                                                                                | <input type="radio"/> much                                                                                                                                                                                                                                                                                                | <input type="radio"/> by night                               |                                            |                                                         |                                                                                                            |                                      |
| Examination                    | <b>Abdominal finding</b>                                                                                                                |                                                                               | <b>Anal finding</b>                                                                                                                            |                                                                                                                                                                                                                                                                                                                           | <b>Perianal eczema</b>                                       | <b>Oral aphtae ulcers</b>                  | <b>Cheilitis</b>                                        | <b>extraintestinal symptoms</b>                                                                            |                                      |
|                                | <input type="radio"/> inconspicuous<br><input type="radio"/> conspicuous                                                                |                                                                               | <input type="checkbox"/> inconspicuous/irritation-free skin-tags                                                                               |                                                                                                                                                                                                                                                                                                                           | <input type="radio"/> no                                     | <input type="radio"/> no                   | <input type="radio"/> no                                | <input type="radio"/> no <input type="radio"/> yes                                                         |                                      |
|                                | <input type="checkbox"/> pressure pain                                                                                                  |                                                                               | <input type="checkbox"/> rhagade/fissure                                                                                                       |                                                                                                                                                                                                                                                                                                                           | <input type="radio"/> yes                                    | <input type="radio"/> yes                  | <input type="radio"/> yes                               | <input type="checkbox"/> eye                                                                               | <input type="checkbox"/> skin        |
|                                | <input type="checkbox"/> resistance                                                                                                     |                                                                               | <input type="checkbox"/> inactive fistula                                                                                                      |                                                                                                                                                                                                                                                                                                                           |                                                              |                                            |                                                         | <input type="checkbox"/> liver/biliary tract/pancreas                                                      | <input type="checkbox"/> PSC/overlap |
|                                | <input type="checkbox"/> defense                                                                                                        |                                                                               | <input type="checkbox"/> secreting fistula/abscess inflam-matory induration                                                                    |                                                                                                                                                                                                                                                                                                                           |                                                              |                                            |                                                         | <input type="checkbox"/> acute pancreatitis                                                                | <input type="checkbox"/> nephritis   |
| <input type="checkbox"/> stoma |                                                                                                                                         | <input type="checkbox"/> multiple/inflammatory skin-tags                      |                                                                                                                                                |                                                                                                                                                                                                                                                                                                                           |                                                              |                                            | <input type="checkbox"/> joint: inflammation peripheral | <input type="checkbox"/> spinal column                                                                     |                                      |
| <b>Tanner' stages</b>          |                                                                                                                                         | PH(1-5) <input type="text"/>                                                  | B(1-5) <input type="text"/>                                                                                                                    | testicular volume (ml) <input type="text"/>                                                                                                                                                                                                                                                                               | menarche: <input type="radio"/> no <input type="radio"/> yes |                                            | (year)                                                  |                                                                                                            |                                      |
| Laboratory                     | hemoglobin                                                                                                                              | <input type="text"/>                                                          | <input type="text"/>                                                                                                                           | CRP                                                                                                                                                                                                                                                                                                                       | <input type="text"/>                                         | albumin                                    | <input type="text"/>                                    | seldom laboratory:<br><input type="radio"/> no<br><input type="radio"/> yes<br><br>(see addi-tional sheet) |                                      |
|                                | hematocrit                                                                                                                              | <input type="text"/>                                                          | <input type="text"/>                                                                                                                           | ESR                                                                                                                                                                                                                                                                                                                       | <input type="text"/>                                         | creatinine                                 | <input type="text"/>                                    |                                                                                                            |                                      |
|                                | MCV                                                                                                                                     | <input type="text"/>                                                          | <input type="text"/>                                                                                                                           | ALAT (GPT)                                                                                                                                                                                                                                                                                                                | <input type="text"/>                                         | calprotectin                               | <input type="text"/>                                    |                                                                                                            |                                      |
|                                | thrombocytes                                                                                                                            | <input type="text"/>                                                          | <input type="text"/>                                                                                                                           | gamma-GT                                                                                                                                                                                                                                                                                                                  | <input type="text"/>                                         |                                            |                                                         |                                                                                                            |                                      |
|                                | leucocytes                                                                                                                              | <input type="text"/>                                                          | <input type="text"/>                                                                                                                           | lipase                                                                                                                                                                                                                                                                                                                    | <input type="text"/>                                         |                                            |                                                         |                                                                                                            |                                      |
| apparative diagnostics         | <b>apparative diagnostics</b> <input type="radio"/> not performed <input type="radio"/> performed                                       |                                                                               |                                                                                                                                                |                                                                                                                                                                                                                                                                                                                           |                                                              |                                            |                                                         |                                                                                                            |                                      |
|                                | <input type="checkbox"/> esophagogastroduodenoscopy                                                                                     | <input type="checkbox"/> MRT-enterography                                     | <input type="checkbox"/> ileokoloscopy                                                                                                         | <input type="checkbox"/> colonoscopy                                                                                                                                                                                                                                                                                      | <input type="checkbox"/> rectosigmoidoscopy                  |                                            |                                                         |                                                                                                            |                                      |
|                                | <input type="checkbox"/> histology lower gastrointestinal tract                                                                         | <input type="checkbox"/> X-ray small intestine                                | <input type="checkbox"/> ultrasound                                                                                                            | <input type="checkbox"/> bone densitometry                                                                                                                                                                                                                                                                                | <input type="checkbox"/> liver biopsy                        |                                            |                                                         |                                                                                                            |                                      |
|                                | <input type="checkbox"/> histology upper gastrointestinal tract                                                                         | <input type="checkbox"/> CT abdomen                                           | <input type="checkbox"/> video capsule endoscopy                                                                                               | <input type="checkbox"/> ERCP                                                                                                                                                                                                                                                                                             | <input type="checkbox"/> MRCP                                |                                            |                                                         |                                                                                                            |                                      |
|                                | <input type="checkbox"/> others: <input type="text"/>                                                                                   |                                                                               |                                                                                                                                                |                                                                                                                                                                                                                                                                                                                           |                                                              |                                            |                                                         |                                                                                                            |                                      |
| Localization                   | <b>Localization</b> <input type="radio"/> inconspicuous                                                                                 |                                                                               |                                                                                                                                                |                                                                                                                                                                                                                                                                                                                           |                                                              |                                            |                                                         |                                                                                                            |                                      |
|                                | <input type="checkbox"/> mouth                                                                                                          | <input type="checkbox"/> esophagus                                            | <input type="checkbox"/> stomach                                                                                                               | <input type="checkbox"/> duodenum                                                                                                                                                                                                                                                                                         | <input type="checkbox"/> remaining small intesine            | <input type="checkbox"/> term. ileum       | <input type="checkbox"/> pouch                          |                                                                                                            |                                      |
|                                | <input type="checkbox"/> caecum                                                                                                         | <input type="checkbox"/> colon asc.                                           | <input type="checkbox"/> colon trans.                                                                                                          | <input type="checkbox"/> colon desc.                                                                                                                                                                                                                                                                                      | <input type="checkbox"/> sigmoid colon                       | <input type="checkbox"/> rectum            | <input type="checkbox"/> anus                           |                                                                                                            |                                      |
|                                | <input type="checkbox"/> overall assessment: <input type="text"/>                                                                       |                                                                               |                                                                                                                                                |                                                                                                                                                                                                                                                                                                                           |                                                              |                                            |                                                         |                                                                                                            |                                      |
| Complications                  | <b>Complications</b> <input type="radio"/> no <input type="radio"/> yes                                                                 |                                                                               |                                                                                                                                                |                                                                                                                                                                                                                                                                                                                           |                                                              |                                            |                                                         |                                                                                                            |                                      |
|                                | <input type="checkbox"/> CMV infection                                                                                                  | <input type="checkbox"/> vomiting                                             | <input type="checkbox"/> osteoporosis                                                                                                          | <input type="checkbox"/> perianal fistula                                                                                                                                                                                                                                                                                 | <input type="checkbox"/> other type of fistula               | <input type="checkbox"/> perianal abscess  |                                                         |                                                                                                            |                                      |
|                                | <input type="checkbox"/> other type of abscess                                                                                          | <input type="checkbox"/> biliary calculi                                      | <input type="checkbox"/> stenosis                                                                                                              | <input type="checkbox"/> unreliable medication intake                                                                                                                                                                                                                                                                     |                                                              |                                            |                                                         |                                                                                                            |                                      |



CHRONIC INFLAMMATORY BOWEL DISEASE (IBD) OF CHILDS AND ADOLESCENTS

DOCUMENTATIONFORM

\_\_\_\_ - \_\_\_\_  
Patient's identification number

|                                                   |                                                                                                                                                                                                                                                                                                                                                                                                                                                                                                                                            |                                                                                                                                                       |                                     |                                           |                                            |                                                                                                                                                                                                                     |                                                      |                                                                                 |                                                                                                                                          |                                                                                 |                                                                                                                                                                                                                                                                                                                                                                                                                                                                                                                                                                                                                                                                                                                                                                                                                                                                                                                                                                   |                                    |                                  |                                           |  |  |
|---------------------------------------------------|--------------------------------------------------------------------------------------------------------------------------------------------------------------------------------------------------------------------------------------------------------------------------------------------------------------------------------------------------------------------------------------------------------------------------------------------------------------------------------------------------------------------------------------------|-------------------------------------------------------------------------------------------------------------------------------------------------------|-------------------------------------|-------------------------------------------|--------------------------------------------|---------------------------------------------------------------------------------------------------------------------------------------------------------------------------------------------------------------------|------------------------------------------------------|---------------------------------------------------------------------------------|------------------------------------------------------------------------------------------------------------------------------------------|---------------------------------------------------------------------------------|-------------------------------------------------------------------------------------------------------------------------------------------------------------------------------------------------------------------------------------------------------------------------------------------------------------------------------------------------------------------------------------------------------------------------------------------------------------------------------------------------------------------------------------------------------------------------------------------------------------------------------------------------------------------------------------------------------------------------------------------------------------------------------------------------------------------------------------------------------------------------------------------------------------------------------------------------------------------|------------------------------------|----------------------------------|-------------------------------------------|--|--|
| Surgery                                           | Surgery <input type="radio"/> no <input type="radio"/> yes <input type="radio"/> planned surgery                                                                                                                                                                                                                                                                                                                                                                                                                                           |                                                                                                                                                       |                                     |                                           |                                            |                                                                                                                                                                                                                     |                                                      |                                                                                 |                                                                                                                                          |                                                                                 | date of surgery:                                                                                                                                                                                                                                                                                                                                                                                                                                                                                                                                                                                                                                                                                                                                                                                                                                                                                                                                                  |                                    |                                  |                                           |  |  |
|                                                   | Indication                                                                                                                                                                                                                                                                                                                                                                                                                                                                                                                                 |                                                                                                                                                       |                                     |                                           |                                            | Type of surgery                                                                                                                                                                                                     |                                                      |                                                                                 |                                                                                                                                          |                                                                                 |                                                                                                                                                                                                                                                                                                                                                                                                                                                                                                                                                                                                                                                                                                                                                                                                                                                                                                                                                                   |                                    |                                  |                                           |  |  |
|                                                   | <input type="checkbox"/> conglomerate tumor<br><input type="checkbox"/> stenosis (see additional sheet)<br><input type="checkbox"/> fistula (not perianal) (see additional sheet)<br><input type="checkbox"/> perianal complications (fistula, abscess)<br><input type="checkbox"/> refractory inflammation (therapy-resistant, chronic course)<br><input type="checkbox"/> colon carcinoma<br><input type="checkbox"/> dysplasia/other malignancies: which? <input type="text"/><br><input type="checkbox"/> others: <input type="text"/> |                                                                                                                                                       |                                     |                                           |                                            | <input type="checkbox"/> perforation<br><input type="checkbox"/> megacolon<br><input type="checkbox"/> suture dehiscence<br><input type="checkbox"/> bleeding<br><input type="checkbox"/> abscess (except perianal) |                                                      |                                                                                 |                                                                                                                                          |                                                                                 | <input type="checkbox"/> ileocecal resection<br><input type="checkbox"/> hemicolectomy right<br><input type="checkbox"/> hemicolectomy left<br><input type="checkbox"/> partial colon resection<br><input type="checkbox"/> partial small intestine resection<br><input type="checkbox"/> gastrojejunostomy<br><input type="checkbox"/> fistula/abscess cleavage<br><input type="checkbox"/> colectomy<br><input type="checkbox"/> pouch revision<br><input type="checkbox"/> rectal resection<br><input type="checkbox"/> adhesiolysis<br><input type="checkbox"/> fistula drainage<br><input type="checkbox"/> balloon dilatation<br><input type="checkbox"/> PEG-insertion with jejunal extension<br><input type="checkbox"/> polypectomy<br><input type="checkbox"/> PEG-insertion<br><input type="checkbox"/> stoma insertion<br><input type="checkbox"/> stoma revision<br><input type="checkbox"/> exploration<br><input type="checkbox"/> stricturoplasty |                                    |                                  |                                           |  |  |
| Therapy                                           | Therapy <input type="radio"/> no <input type="radio"/> yes                                                                                                                                                                                                                                                                                                                                                                                                                                                                                 |                                                                                                                                                       |                                     |                                           |                                            |                                                                                                                                                                                                                     |                                                      |                                                                                 |                                                                                                                                          |                                                                                 |                                                                                                                                                                                                                                                                                                                                                                                                                                                                                                                                                                                                                                                                                                                                                                                                                                                                                                                                                                   |                                    |                                  |                                           |  |  |
|                                                   | <input type="checkbox"/> sulfasalazine                                                                                                                                                                                                                                                                                                                                                                                                                                                                                                     |                                                                                                                                                       | start:                              |                                           | end:                                       |                                                                                                                                                                                                                     | dosis:                                               | mg/day                                                                          | <input type="checkbox"/> trace elements:                                                                                                 |                                                                                 | <input type="checkbox"/> folic acid                                                                                                                                                                                                                                                                                                                                                                                                                                                                                                                                                                                                                                                                                                                                                                                                                                                                                                                               | <input type="checkbox"/> vitamin D |                                  |                                           |  |  |
|                                                   | <input type="checkbox"/> mesalazine                                                                                                                                                                                                                                                                                                                                                                                                                                                                                                        |                                                                                                                                                       | start:                              |                                           | end:                                       |                                                                                                                                                                                                                     | dosis:                                               | mg/day                                                                          |                                                                                                                                          |                                                                                 | <input type="checkbox"/> vitamin B <sub>12</sub>                                                                                                                                                                                                                                                                                                                                                                                                                                                                                                                                                                                                                                                                                                                                                                                                                                                                                                                  | <input type="checkbox"/> calcium   |                                  |                                           |  |  |
|                                                   | <input type="checkbox"/> azathioprine<br><input type="radio"/> Allopurinol                                                                                                                                                                                                                                                                                                                                                                                                                                                                 |                                                                                                                                                       | start:                              |                                           | end:                                       |                                                                                                                                                                                                                     | dosis:                                               | mg/day                                                                          |                                                                                                                                          |                                                                                 | <input type="checkbox"/> zinc                                                                                                                                                                                                                                                                                                                                                                                                                                                                                                                                                                                                                                                                                                                                                                                                                                                                                                                                     | <input type="checkbox"/> selenium  |                                  |                                           |  |  |
|                                                   | <input type="checkbox"/> 6-mercaptopurine                                                                                                                                                                                                                                                                                                                                                                                                                                                                                                  |                                                                                                                                                       | start:                              |                                           | end:                                       |                                                                                                                                                                                                                     | dosis:                                               | mg/day                                                                          | <input type="checkbox"/> complementary medicine                                                                                          |                                                                                 | <input type="checkbox"/> incense                                                                                                                                                                                                                                                                                                                                                                                                                                                                                                                                                                                                                                                                                                                                                                                                                                                                                                                                  | <input type="checkbox"/> fish oil  |                                  |                                           |  |  |
|                                                   | <input type="checkbox"/> mycophenolate mofetil                                                                                                                                                                                                                                                                                                                                                                                                                                                                                             |                                                                                                                                                       | start:                              |                                           | end:                                       |                                                                                                                                                                                                                     | dosis:                                               | mg/day                                                                          |                                                                                                                                          |                                                                                 | <input type="checkbox"/> lecithin                                                                                                                                                                                                                                                                                                                                                                                                                                                                                                                                                                                                                                                                                                                                                                                                                                                                                                                                 |                                    |                                  |                                           |  |  |
|                                                   | <input type="checkbox"/> acid blockers                                                                                                                                                                                                                                                                                                                                                                                                                                                                                                     |                                                                                                                                                       | start:                              |                                           | end:                                       |                                                                                                                                                                                                                     | dosis:                                               | mg/day                                                                          | <input type="checkbox"/> nutritional therapy                                                                                             |                                                                                 | <input type="radio"/> exclusively                                                                                                                                                                                                                                                                                                                                                                                                                                                                                                                                                                                                                                                                                                                                                                                                                                                                                                                                 | <input type="radio"/> partially    |                                  |                                           |  |  |
|                                                   | <input type="checkbox"/> ursodeoxycholic acid                                                                                                                                                                                                                                                                                                                                                                                                                                                                                              |                                                                                                                                                       | start:                              |                                           | end:                                       |                                                                                                                                                                                                                     | dosis:                                               | mg/day                                                                          |                                                                                                                                          |                                                                                 | <input type="radio"/> supplementary                                                                                                                                                                                                                                                                                                                                                                                                                                                                                                                                                                                                                                                                                                                                                                                                                                                                                                                               |                                    |                                  |                                           |  |  |
|                                                   | <input type="checkbox"/> loperamide                                                                                                                                                                                                                                                                                                                                                                                                                                                                                                        |                                                                                                                                                       | start:                              |                                           | end:                                       |                                                                                                                                                                                                                     | dosis:                                               | mg/day                                                                          | <input type="checkbox"/> probiotics:                                                                                                     |                                                                                 | <input type="radio"/> no                                                                                                                                                                                                                                                                                                                                                                                                                                                                                                                                                                                                                                                                                                                                                                                                                                                                                                                                          | <input type="radio"/> yes          |                                  |                                           |  |  |
|                                                   | <input type="checkbox"/> steroid pulse therapy                                                                                                                                                                                                                                                                                                                                                                                                                                                                                             |                                                                                                                                                       | start:                              |                                           | end:                                       |                                                                                                                                                                                                                     | dosis:                                               | mg/day                                                                          |                                                                                                                                          |                                                                                 | <input type="checkbox"/> antibiotics:                                                                                                                                                                                                                                                                                                                                                                                                                                                                                                                                                                                                                                                                                                                                                                                                                                                                                                                             |                                    | <input type="radio"/> no         | <input type="radio"/> yes (s. add. sheet) |  |  |
|                                                   | <input type="checkbox"/> methotrexate                                                                                                                                                                                                                                                                                                                                                                                                                                                                                                      |                                                                                                                                                       | start:                              |                                           | end:                                       |                                                                                                                                                                                                                     | dosis:                                               | mg/week<br><input type="radio"/> s.c <input type="radio"/> p.o                  | <input type="radio"/> no folic acid <input type="radio"/> 5mg folic acid single dosis<br><input type="radio"/> 1mg folic acid for 5 days |                                                                                 |                                                                                                                                                                                                                                                                                                                                                                                                                                                                                                                                                                                                                                                                                                                                                                                                                                                                                                                                                                   |                                    |                                  |                                           |  |  |
|                                                   | <input type="checkbox"/> infliximab                                                                                                                                                                                                                                                                                                                                                                                                                                                                                                        |                                                                                                                                                       | start:                              |                                           | end:                                       |                                                                                                                                                                                                                     | dosis:                                               | mg                                                                              |                                                                                                                                          |                                                                                 | <input type="radio"/> every ____ week(s)                                                                                                                                                                                                                                                                                                                                                                                                                                                                                                                                                                                                                                                                                                                                                                                                                                                                                                                          |                                    |                                  |                                           |  |  |
|                                                   | <input type="checkbox"/> adalimumab                                                                                                                                                                                                                                                                                                                                                                                                                                                                                                        |                                                                                                                                                       | start:                              |                                           | end:                                       |                                                                                                                                                                                                                     | dosis:                                               | mg                                                                              | <input type="radio"/> every ____ week(s)                                                                                                 |                                                                                 |                                                                                                                                                                                                                                                                                                                                                                                                                                                                                                                                                                                                                                                                                                                                                                                                                                                                                                                                                                   |                                    |                                  |                                           |  |  |
|                                                   | <input type="checkbox"/> other biologicals                                                                                                                                                                                                                                                                                                                                                                                                                                                                                                 |                                                                                                                                                       | start:                              |                                           | end:                                       |                                                                                                                                                                                                                     | dosis:                                               | mg                                                                              |                                                                                                                                          |                                                                                 | <input type="radio"/> every ____ week(s) name:                                                                                                                                                                                                                                                                                                                                                                                                                                                                                                                                                                                                                                                                                                                                                                                                                                                                                                                    |                                    |                                  |                                           |  |  |
|                                                   | <input type="checkbox"/> vedolizumab <sup>1</sup>                                                                                                                                                                                                                                                                                                                                                                                                                                                                                          |                                                                                                                                                       | start:                              |                                           | end:                                       |                                                                                                                                                                                                                     | dosis:                                               | mg                                                                              | <input type="radio"/> every ____ week(s)                                                                                                 |                                                                                 |                                                                                                                                                                                                                                                                                                                                                                                                                                                                                                                                                                                                                                                                                                                                                                                                                                                                                                                                                                   |                                    | <sup>1</sup> cave: off-label use |                                           |  |  |
|                                                   | <input type="checkbox"/> ustekinumab <sup>1</sup>                                                                                                                                                                                                                                                                                                                                                                                                                                                                                          |                                                                                                                                                       | start:                              |                                           | end:                                       |                                                                                                                                                                                                                     | dosis:                                               | mg                                                                              |                                                                                                                                          |                                                                                 | <input type="radio"/> every ____ week(s)                                                                                                                                                                                                                                                                                                                                                                                                                                                                                                                                                                                                                                                                                                                                                                                                                                                                                                                          |                                    |                                  |                                           |  |  |
|                                                   | <input type="checkbox"/> golimumab <sup>1</sup>                                                                                                                                                                                                                                                                                                                                                                                                                                                                                            |                                                                                                                                                       | start:                              |                                           | end:                                       |                                                                                                                                                                                                                     | dosis:                                               | mg                                                                              | <input type="radio"/> every ____ week(s)                                                                                                 |                                                                                 |                                                                                                                                                                                                                                                                                                                                                                                                                                                                                                                                                                                                                                                                                                                                                                                                                                                                                                                                                                   |                                    |                                  |                                           |  |  |
| <input type="checkbox"/> tofacitinib <sup>1</sup> |                                                                                                                                                                                                                                                                                                                                                                                                                                                                                                                                            | start:                                                                                                                                                |                                     | end:                                      |                                            | dosis:                                                                                                                                                                                                              | mg                                                   | <input type="radio"/> every ____ week(s)                                        |                                                                                                                                          |                                                                                 |                                                                                                                                                                                                                                                                                                                                                                                                                                                                                                                                                                                                                                                                                                                                                                                                                                                                                                                                                                   |                                    |                                  |                                           |  |  |
| <input type="checkbox"/> cyclosporine A           |                                                                                                                                                                                                                                                                                                                                                                                                                                                                                                                                            | start:                                                                                                                                                |                                     | end:                                      |                                            | dosis:                                                                                                                                                                                                              | mg/day                                               |                                                                                 |                                                                                                                                          | <input type="radio"/> p.o <input type="radio"/> i.v. <input type="radio"/> n.s. |                                                                                                                                                                                                                                                                                                                                                                                                                                                                                                                                                                                                                                                                                                                                                                                                                                                                                                                                                                   |                                    |                                  |                                           |  |  |
| <input type="checkbox"/> iron                     |                                                                                                                                                                                                                                                                                                                                                                                                                                                                                                                                            | start:                                                                                                                                                |                                     | end:                                      |                                            | dosis:                                                                                                                                                                                                              | mg/dosis                                             | <input type="radio"/> p.o <input type="radio"/> i.v. <input type="radio"/> n.s. |                                                                                                                                          |                                                                                 |                                                                                                                                                                                                                                                                                                                                                                                                                                                                                                                                                                                                                                                                                                                                                                                                                                                                                                                                                                   |                                    |                                  |                                           |  |  |
| <input type="checkbox"/> special diet             |                                                                                                                                                                                                                                                                                                                                                                                                                                                                                                                                            | start:                                                                                                                                                |                                     | end:                                      |                                            | name:                                                                                                                                                                                                               |                                                      |                                                                                 |                                                                                                                                          |                                                                                 |                                                                                                                                                                                                                                                                                                                                                                                                                                                                                                                                                                                                                                                                                                                                                                                                                                                                                                                                                                   |                                    |                                  |                                           |  |  |
| <input type="checkbox"/> rectal therapy           |                                                                                                                                                                                                                                                                                                                                                                                                                                                                                                                                            | <input type="checkbox"/> 5-ASA mesalazine <input type="checkbox"/> corticoids <input type="checkbox"/> budesonide <input type="checkbox"/> tacrolimus |                                     |                                           |                                            |                                                                                                                                                                                                                     |                                                      |                                                                                 |                                                                                                                                          |                                                                                 |                                                                                                                                                                                                                                                                                                                                                                                                                                                                                                                                                                                                                                                                                                                                                                                                                                                                                                                                                                   |                                    |                                  |                                           |  |  |
| Ono<br>Yes                                        | <input type="checkbox"/> budesonide                                                                                                                                                                                                                                                                                                                                                                                                                                                                                                        |                                                                                                                                                       | start:                              |                                           | end:                                       |                                                                                                                                                                                                                     | dosis:                                               | mg/day                                                                          |                                                                                                                                          |                                                                                 |                                                                                                                                                                                                                                                                                                                                                                                                                                                                                                                                                                                                                                                                                                                                                                                                                                                                                                                                                                   |                                    |                                  |                                           |  |  |
|                                                   | <input type="checkbox"/> (methyl-)prednisolone                                                                                                                                                                                                                                                                                                                                                                                                                                                                                             |                                                                                                                                                       | start:                              |                                           | end:                                       |                                                                                                                                                                                                                     | dosis:                                               | mg/day                                                                          | maximum dose:                                                                                                                            |                                                                                 |                                                                                                                                                                                                                                                                                                                                                                                                                                                                                                                                                                                                                                                                                                                                                                                                                                                                                                                                                                   |                                    |                                  |                                           |  |  |
|                                                   | <input type="checkbox"/> hydrocortisone                                                                                                                                                                                                                                                                                                                                                                                                                                                                                                    |                                                                                                                                                       | start:                              |                                           | end:                                       |                                                                                                                                                                                                                     | dosis:                                               | mg/day                                                                          |                                                                                                                                          |                                                                                 |                                                                                                                                                                                                                                                                                                                                                                                                                                                                                                                                                                                                                                                                                                                                                                                                                                                                                                                                                                   |                                    |                                  |                                           |  |  |
| Side effects                                      | Side effects <input type="radio"/> no <input type="radio"/> yes                                                                                                                                                                                                                                                                                                                                                                                                                                                                            |                                                                                                                                                       |                                     |                                           |                                            |                                                                                                                                                                                                                     |                                                      |                                                                                 |                                                                                                                                          |                                                                                 |                                                                                                                                                                                                                                                                                                                                                                                                                                                                                                                                                                                                                                                                                                                                                                                                                                                                                                                                                                   |                                    |                                  |                                           |  |  |
|                                                   | <input type="checkbox"/> depressiveness                                                                                                                                                                                                                                                                                                                                                                                                                                                                                                    |                                                                                                                                                       | <input type="checkbox"/> acne       |                                           | <input type="checkbox"/> Cushing's disease |                                                                                                                                                                                                                     | <input type="checkbox"/> increased levels of lipases |                                                                                 | <input type="checkbox"/> increased levels of transaminases                                                                               |                                                                                 | <input type="checkbox"/> glaucoma                                                                                                                                                                                                                                                                                                                                                                                                                                                                                                                                                                                                                                                                                                                                                                                                                                                                                                                                 |                                    |                                  |                                           |  |  |
|                                                   | <input type="checkbox"/> abdominal pain                                                                                                                                                                                                                                                                                                                                                                                                                                                                                                    |                                                                                                                                                       | <input type="checkbox"/> diarrhea   |                                           | <input type="checkbox"/> hypertrichosis    |                                                                                                                                                                                                                     | <input type="checkbox"/> acute allergic reaction     |                                                                                 | <input type="checkbox"/> hypertension                                                                                                    |                                                                                 | <input type="checkbox"/> alopecia <input type="checkbox"/> leukopenia                                                                                                                                                                                                                                                                                                                                                                                                                                                                                                                                                                                                                                                                                                                                                                                                                                                                                             |                                    |                                  |                                           |  |  |
| <input type="checkbox"/> vomiting/nausea          |                                                                                                                                                                                                                                                                                                                                                                                                                                                                                                                                            | <input type="checkbox"/> headaches                                                                                                                    |                                     | <input type="checkbox"/> thrombocytopenia |                                            | <input type="checkbox"/> personality changes                                                                                                                                                                        |                                                      | <input type="checkbox"/> nephritis/increased levels of creatinine               |                                                                                                                                          | <input type="checkbox"/> pancreatitis                                           |                                                                                                                                                                                                                                                                                                                                                                                                                                                                                                                                                                                                                                                                                                                                                                                                                                                                                                                                                                   |                                    |                                  |                                           |  |  |
| conclusion                                        | Medical overall assessment                                                                                                                                                                                                                                                                                                                                                                                                                                                                                                                 |                                                                                                                                                       |                                     |                                           |                                            |                                                                                                                                                                                                                     | Psychosocial therapy                                 |                                                                                 |                                                                                                                                          | Ophthalmologist appointment                                                     |                                                                                                                                                                                                                                                                                                                                                                                                                                                                                                                                                                                                                                                                                                                                                                                                                                                                                                                                                                   |                                    |                                  |                                           |  |  |
|                                                   | <input type="radio"/> remission                                                                                                                                                                                                                                                                                                                                                                                                                                                                                                            |                                                                                                                                                       | <input type="radio"/> mild activity |                                           | <input type="radio"/> moderate activity    |                                                                                                                                                                                                                     | <input type="radio"/> severe activity                |                                                                                 | <input type="radio"/> no <input type="radio"/> yes                                                                                       |                                                                                 | <input type="radio"/> no <input type="radio"/> yes                                                                                                                                                                                                                                                                                                                                                                                                                                                                                                                                                                                                                                                                                                                                                                                                                                                                                                                |                                    |                                  |                                           |  |  |

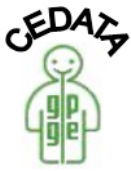

CHRONIC INFLAMMATORY BOWEL DISEASE (IBD) OF CHILDS AND ADOLESCENTS

ADDITIONAL SHEET

|  |  |  |  |  |  |
|--|--|--|--|--|--|
|  |  |  |  |  |  |
|--|--|--|--|--|--|

Date of investigation (DD/MM/YYYY)

|  |  |  |  |  |  |  |  |
|--|--|--|--|--|--|--|--|
|  |  |  |  |  |  |  |  |
|--|--|--|--|--|--|--|--|

Patient's identification number

|                                                                              |                                                                                                       |                                                                                                       |                                                                                                                                  |            |         |                                                                  |                                                                                                                           |  |                                                                  |                                                                                                   |                            |                            |
|------------------------------------------------------------------------------|-------------------------------------------------------------------------------------------------------|-------------------------------------------------------------------------------------------------------|----------------------------------------------------------------------------------------------------------------------------------|------------|---------|------------------------------------------------------------------|---------------------------------------------------------------------------------------------------------------------------|--|------------------------------------------------------------------|---------------------------------------------------------------------------------------------------|----------------------------|----------------------------|
| Seldom laboratory                                                            | <b>Immunodeficiency</b>                                                                               | <b>TPMT Aktivty</b>                                                                                   | <b>6TG</b>                                                                                                                       |            |         |                                                                  | <b>MMP</b>                                                                                                                |  |                                                                  | <b>Anti-HBS</b>                                                                                   |                            |                            |
|                                                                              | <input type="radio"/> no <input type="radio"/> yes<br><br>_____ Onmol/gHg*h<br>OmU/L Onmol/ml x RBC*h | <input type="radio"/> no <input type="radio"/> yes<br><br>_____ Onmol/gHg*h<br>OmU/L Onmol/ml x RBC*h | <input type="radio"/> no <input type="radio"/> yes<br><br>_____ Opmol/0,2 ml<br><input type="radio"/> pmol/8*10 <sup>8</sup> RBC |            |         |                                                                  | <input type="radio"/> no <input type="radio"/> yes<br><br>_____ Opmol/8x10 <sup>8</sup> Eryth<br>Onmol/gHg*h Opmol/0,2 ml |  |                                                                  | <input type="radio"/> no <input type="radio"/> yes<br><br>_____ U/ml                              |                            |                            |
|                                                                              | <b>Infliximab-level</b>                                                                               | <b>Infliximab-antibody-level</b>                                                                      | <b>Adalimumab-level</b>                                                                                                          |            |         |                                                                  | <b>Adalimumab-antibody-level</b>                                                                                          |  |                                                                  | <b>Hepatitis B serology</b>                                                                       |                            |                            |
|                                                                              | <input type="radio"/> no <input type="radio"/> yes<br>_____ µg/ml<br>date of sampeling:               | <input type="radio"/> no <input type="radio"/> yes<br>_____ AU/ml<br>date of sampeling:               | <input type="radio"/> no <input type="radio"/> yes<br>_____ µg/ml<br>date of sampeling:                                          |            |         |                                                                  | <input type="radio"/> no <input type="radio"/> yes<br>_____ AU/ml<br>date of sampeling:                                   |  |                                                                  | <input type="radio"/> positive<br><input type="radio"/> negative<br><input type="radio"/> unknown |                            |                            |
|                                                                              | <b>Hepatitis C serology</b>                                                                           | <b>HBV-DNA-PCR</b>                                                                                    |                                                                                                                                  | <b>EBV</b> |         |                                                                  | <b>Tuberculosis skin test</b>                                                                                             |  |                                                                  | <b>Tuberculosis blood test</b>                                                                    |                            |                            |
| <input type="radio"/> positive<br><input type="radio"/> negative             | <input type="radio"/> positive<br><input type="radio"/> negative                                      |                                                                                                       | <input type="radio"/> positive<br><input type="radio"/> negative                                                                 |            |         | <input type="radio"/> positive<br><input type="radio"/> negative |                                                                                                                           |  | <input type="radio"/> positive<br><input type="radio"/> negative |                                                                                                   |                            |                            |
| <b>Antibiotic therapy</b> <input type="radio"/> yes <input type="radio"/> no |                                                                                                       |                                                                                                       |                                                                                                                                  |            |         |                                                                  |                                                                                                                           |  |                                                                  |                                                                                                   |                            |                            |
| Antibiotic therapy                                                           | <input type="checkbox"/> amoxicillin                                                                  | start:                                                                                                |                                                                                                                                  | end:       |         | reason:                                                          |                                                                                                                           |  |                                                                  | <input type="radio"/> p.o                                                                         | <input type="radio"/> i.v. | <input type="radio"/> n.s. |
|                                                                              | <input type="checkbox"/> ampicillin                                                                   | start:                                                                                                |                                                                                                                                  | end:       |         | reason:                                                          |                                                                                                                           |  |                                                                  | <input type="radio"/> p.o                                                                         | <input type="radio"/> i.v. | <input type="radio"/> n.s. |
|                                                                              | <input type="checkbox"/> cefotaxime                                                                   | start:                                                                                                |                                                                                                                                  | end:       |         | reason:                                                          |                                                                                                                           |  |                                                                  | <input type="radio"/> p.o                                                                         | <input type="radio"/> i.v. | <input type="radio"/> n.s. |
|                                                                              | <input type="checkbox"/> cefpodoxime                                                                  | start:                                                                                                |                                                                                                                                  | end:       |         | reason:                                                          |                                                                                                                           |  |                                                                  | <input type="radio"/> p.o                                                                         | <input type="radio"/> i.v. | <input type="radio"/> n.s. |
|                                                                              | <input type="checkbox"/> ceftazolin                                                                   | start:                                                                                                |                                                                                                                                  | end:       |         | reason:                                                          |                                                                                                                           |  |                                                                  | <input type="radio"/> p.o                                                                         | <input type="radio"/> i.v. | <input type="radio"/> n.s. |
|                                                                              | <input type="checkbox"/> ceftriaxone                                                                  | start:                                                                                                |                                                                                                                                  | end:       |         | reason:                                                          |                                                                                                                           |  |                                                                  | <input type="radio"/> p.o                                                                         | <input type="radio"/> i.v. | <input type="radio"/> n.s. |
|                                                                              | <input type="checkbox"/> cefuroxime                                                                   | start:                                                                                                |                                                                                                                                  | end:       |         | reason:                                                          |                                                                                                                           |  |                                                                  | <input type="radio"/> p.o                                                                         | <input type="radio"/> i.v. | <input type="radio"/> n.s. |
|                                                                              | <input type="checkbox"/> ciprofloxacin                                                                | start:                                                                                                |                                                                                                                                  | end:       |         | reason:                                                          |                                                                                                                           |  |                                                                  | <input type="radio"/> p.o                                                                         | <input type="radio"/> i.v. | <input type="radio"/> n.s. |
|                                                                              | <input type="checkbox"/> clarithromycin                                                               | start:                                                                                                |                                                                                                                                  | end:       |         | reason:                                                          |                                                                                                                           |  |                                                                  | <input type="radio"/> p.o                                                                         | <input type="radio"/> i.v. | <input type="radio"/> n.s. |
|                                                                              | <input type="checkbox"/> clindamycin                                                                  | start:                                                                                                |                                                                                                                                  | end:       |         | reason:                                                          |                                                                                                                           |  |                                                                  | <input type="radio"/> p.o                                                                         | <input type="radio"/> i.v. | <input type="radio"/> n.s. |
|                                                                              | <input type="checkbox"/> cotrimoxazole                                                                | start:                                                                                                |                                                                                                                                  | end:       |         | reason:                                                          |                                                                                                                           |  |                                                                  | <input type="radio"/> p.o                                                                         | <input type="radio"/> i.v. | <input type="radio"/> n.s. |
|                                                                              | <input type="checkbox"/> daptomycin                                                                   | start:                                                                                                |                                                                                                                                  | end:       |         | reason:                                                          |                                                                                                                           |  |                                                                  | <input type="radio"/> p.o                                                                         | <input type="radio"/> i.v. | <input type="radio"/> n.s. |
|                                                                              | <input type="checkbox"/> doxycycline                                                                  | start:                                                                                                |                                                                                                                                  | end:       |         | reason:                                                          |                                                                                                                           |  |                                                                  | <input type="radio"/> p.o                                                                         | <input type="radio"/> i.v. | <input type="radio"/> n.s. |
|                                                                              | <input type="checkbox"/> erythromycin                                                                 | start:                                                                                                |                                                                                                                                  | end:       |         | reason:                                                          |                                                                                                                           |  |                                                                  | <input type="radio"/> p.o                                                                         | <input type="radio"/> i.v. | <input type="radio"/> n.s. |
|                                                                              | <input type="checkbox"/> imipenem                                                                     | start:                                                                                                |                                                                                                                                  | end:       |         | reason:                                                          |                                                                                                                           |  |                                                                  | <input type="radio"/> p.o                                                                         | <input type="radio"/> i.v. | <input type="radio"/> n.s. |
|                                                                              | <input type="checkbox"/> linezolid                                                                    | start:                                                                                                |                                                                                                                                  | end:       |         | reason:                                                          |                                                                                                                           |  |                                                                  | <input type="radio"/> p.o                                                                         | <input type="radio"/> i.v. | <input type="radio"/> n.s. |
|                                                                              | <input type="checkbox"/> meropenem                                                                    | start:                                                                                                |                                                                                                                                  | end:       |         | reason:                                                          |                                                                                                                           |  |                                                                  | <input type="radio"/> p.o                                                                         | <input type="radio"/> i.v. | <input type="radio"/> n.s. |
|                                                                              | <input type="checkbox"/> metronidazole                                                                | start:                                                                                                |                                                                                                                                  | end:       |         | reason:                                                          |                                                                                                                           |  |                                                                  | <input type="radio"/> p.o                                                                         | <input type="radio"/> i.v. | <input type="radio"/> n.s. |
|                                                                              | <input type="checkbox"/> paromomycin                                                                  | start:                                                                                                |                                                                                                                                  | end:       |         | reason:                                                          |                                                                                                                           |  |                                                                  | <input type="radio"/> p.o                                                                         | <input type="radio"/> i.v. | <input type="radio"/> n.s. |
|                                                                              | <input type="checkbox"/> piperacillin/sulbactan                                                       | start:                                                                                                |                                                                                                                                  | end:       |         | reason:                                                          |                                                                                                                           |  |                                                                  | <input type="radio"/> p.o                                                                         | <input type="radio"/> i.v. | <input type="radio"/> n.s. |
| <input type="checkbox"/> piperacillin/tazobactam                             | start:                                                                                                |                                                                                                       | end:                                                                                                                             |            | reason: |                                                                  |                                                                                                                           |  | <input type="radio"/> p.o                                        | <input type="radio"/> i.v.                                                                        | <input type="radio"/> n.s. |                            |
| <input type="checkbox"/> penicillin                                          | start:                                                                                                |                                                                                                       | end:                                                                                                                             |            | reason: |                                                                  |                                                                                                                           |  | <input type="radio"/> p.o                                        | <input type="radio"/> i.v.                                                                        | <input type="radio"/> n.s. |                            |
| <input type="checkbox"/> rifaximin                                           | start:                                                                                                |                                                                                                       | end:                                                                                                                             |            | reason: |                                                                  |                                                                                                                           |  | <input type="radio"/> p.o                                        | <input type="radio"/> i.v.                                                                        | <input type="radio"/> n.s. |                            |
| <input type="checkbox"/> vancomycin                                          | start:                                                                                                |                                                                                                       | end:                                                                                                                             |            | reason: |                                                                  |                                                                                                                           |  | <input type="radio"/> p.o                                        | <input type="radio"/> i.v.                                                                        | <input type="radio"/> n.s. |                            |

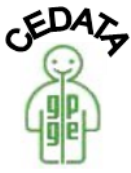

CHRONIC INFLAMMATORY BOWEL DISEASE (IBD) OF CHILDS AND ADOLESCENTS

ADDITIONAL SHEET

|  |  |  |  |  |  |
|--|--|--|--|--|--|
|  |  |  |  |  |  |
|--|--|--|--|--|--|

Date of investigation (DD/MM/YYYY)

|  |  |  |  |  |  |  |  |  |  |
|--|--|--|--|--|--|--|--|--|--|
|  |  |  |  |  |  |  |  |  |  |
|--|--|--|--|--|--|--|--|--|--|

Patient's identification number

|                                       |                                                                          |                                            |                                   |                              |                             |
|---------------------------------------|--------------------------------------------------------------------------|--------------------------------------------|-----------------------------------|------------------------------|-----------------------------|
| Indication for surgery                | <b>Localization (referring to stenosis as indication for surgery):</b>   |                                            |                                   |                              |                             |
|                                       | <input type="radio"/> esophagus                                          | <input type="radio"/> duodenum             | <input type="radio"/> term. ileum | <input type="radio"/> rectum | <input type="radio"/> stoma |
|                                       | <input type="radio"/> stomach                                            | <input type="radio"/> prox. ileum, jejunum | <input type="radio"/> colon       | <input type="radio"/> pouch  |                             |
|                                       | <b>Type of fistula (referring to fistula as indication for surgery):</b> |                                            |                                   |                              |                             |
| <input type="radio"/> rectovaginal    | <input type="radio"/> enterovesical                                      | <input type="radio"/> enterocolistic       |                                   |                              |                             |
| <input type="radio"/> enterocutaneous | <input type="radio"/> enteroenteral                                      | <input type="radio"/> ending blindly       |                                   |                              |                             |
